# Supplementary material for: Establishment and validation of a heart failure risk prediction model for elderly patients after coronary rotational atherectomy based on machine learning
Source: PeerJ. 2024 Jan 31;12:e16867. doi: 10.7717/peerj.16867 (PMC10838101; doi:10.7717/peerj.16867)
Supplement: Supplemental Information 2 [file peerj-12-16867-s002.xlsx]

## Sheet: Sheet2
Variables	Value code	Annotation
ID
Gender
	1	Male
	2	Female
Age
Hypertension
	0	No
	1	Yes
Diabetes
	0	No
	1	Yes
Cerebrovascular disease
	0	No
	1	Yes
Ischemic cardiomyopathy
	0	No
	1	Yes
Chronic renal insufficiency
	0	No
	1	Yes
LVEF
Preoperative CK-MB
Preoperative Troponin
NT-bnpBNP
Serum creatinine
Fasting blood glucose
HbA1c
Hemoglobin
Blood cholesterol
Triglyceride
LDL-C
VLDL-C
Heart failure
	0	No
	1	Yes
Group
	1	Training group
	2	Validation group
